# Supplementary material
Source: Springer Nature journal article supplement (https://www.springermedizin.de/resource/supplementary/12889_2010_2931_MOESM1_ESM.pdf/9487716)
Supplement: MOESM1 [file 9487716]

Total number dialed  
= **22523**

Uncontactable on  
1<sup>st</sup> attempt  
= **4517**

Uncontactable due to number being  
engaged, invalid number, number  
terminated, connected to fax machine  
= **13649**

Responded on 1<sup>st</sup>  
attempt  
= **4357**

Uncontactable  
despite 3<sup>rd</sup> attempt  
= **2099**

Refused to be  
interviewed  
= **1082**

Refused to be  
interviewed  
= **1729**

Incomplete  
interview  
= **205**

Responded, completed  
interview on 2<sup>nd</sup> or 3<sup>rd</sup>  
attempt  
= **1300**

Incomplete  
interview  
= **36**

Completed interview  
on 1<sup>st</sup> attempted  
= **2423**

Total completed  
interview  
= **3723**
